## Correction: BAG3 promotes tumour cell proliferation by regulating EGFR signal transduction pathways in triple negative breast cancer

Sarah Shields<sup>1</sup>, Emer Conroy<sup>1</sup>, Tony O'Grady<sup>5</sup>, Alo McGoldrick<sup>1</sup>, Kate Connor<sup>4</sup>, Mark P. Ward<sup>4</sup>, Zivile Useckaite<sup>4</sup>, Eugene Dempsey<sup>6</sup>, Rebecca Reilly<sup>1</sup>, Yue Fan<sup>1</sup>, Anthony Chubb<sup>4</sup>, David Gomez Matallanas<sup>2,3</sup>, Elaine W. Kay<sup>5</sup>, Darran O'Connor<sup>4</sup>, Amanda McCann<sup>1,2</sup>, William M. Gallagher<sup>1</sup> and Judith A. Coppinger<sup>1,4</sup>

<sup>1</sup> UCD School of Biomolecular and Biomedical Science, University College Dublin, Dublin 4, Ireland

<sup>2</sup> UCD School of Medicine, University College Dublin, Dublin 4, Ireland

<sup>3</sup> Systems Biology Ireland, University College, Dublin 4, Ireland

<sup>4</sup> Royal College of Surgeons in Ireland, Dublin 2, Ireland

<sup>5</sup> Royal College of Surgeons in Ireland, Beaumont Hospital, Dublin 9, Ireland

<sup>6</sup> School of Biology and Environmental Science, University College Dublin, Dublin 4, Ireland

**Published:** May 03, 2019

**Copyright:** Shields et al. This is an open-access article distributed under the terms of the Creative Commons Attribution License 3.0 (CC BY 3.0), which permits unrestricted use, distribution, and reproduction in any medium, provided the original author and source are credited.

**This article has been corrected:** The correct Acknowledgments and Funding information is given below:

### ACKNOWLEDGMENTS AND FUNDING

This work was supported by the Science Foundation of Ireland, School of Biomolecular and Biomedical Sciences at University College Dublin and the Irish Cancer Society Collaborative Cancer Research Centre BREAST-PREDICT. We would like to acknowledge the National Children's Research Centre and the Royal College of Surgeons in Ireland for their support. We would also like to thank the Proteomics/Confocal Microscopy Cores, University College Dublin, We would like to thank St Vincent's University Hospital for their collaboration on the TNBC Patient Cohort (Cohort 3). Finally we would like to acknowledge servier.com for templates used in creating Figure 5E.

Original article: Oncotarget. 2018; 9:15673-15690. <https://doi.org/10.18632/oncotarget.24590>
